# Supplementary material for: Texting while driving: A study of 1211 U.S. adults with the Distracted Driving Survey
Source: PubMed Central journal article supplement — Prev Med Rep. 2016 Sep 7;4:486–9. doi: 10.1016/j.pmedr.2016.09.003 (PMC5030365; doi:10.1016/j.pmedr.2016.09.003), 2016-09-07
Supplement: mmc1.pdf [file mmc1.pdf]

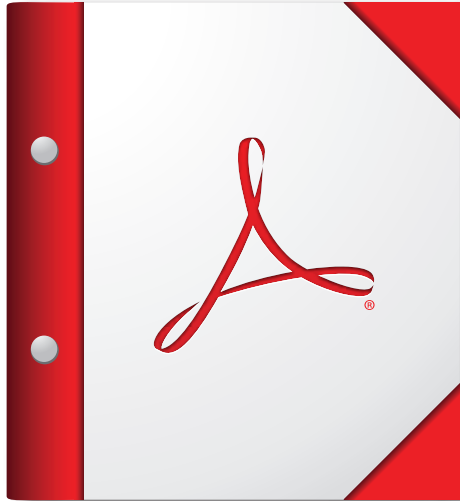

**For the best experience, open this PDF portfolio in  
Acrobat 9 or Adobe Reader 9, or later.**

[Get Adobe Reader Now!](#)
